# Supplementary material for: Effect of Pig-Adipose-Derived Stem Cells’ Conditioned Media on Skin Wound-Healing Characteristics In Vitro
Source: MDPI journal article supplement (doi:10.3390/ijms22115469), 2021-05-22
Supplement: s1 [file s1]

**Effect of Pig-Adipose-Derived Stem Cells' Conditioned Media on Skin Wound-  
Healing Characteristics In Vitro**

Joanna Wiśniewska, Magda Słyszewska, Karolina Stałanowska, Katarzyna Walendzik,

Marta Kopcewicz, Sylwia Machcińska, Barbara Gawrońska-Kozak

**Supplementary Table S1:** Gene names and primer-probe sets used in real-time PCR.

| Inventoried TaqMan® Gene Expression Assays   |                                                                           |                                           |                                                                      |
|----------------------------------------------|---------------------------------------------------------------------------|-------------------------------------------|----------------------------------------------------------------------|
| Gene symbol                                  | Gene name                                                                 |                                           | Primer and probe sets ID                                             |
| CCN2 (CTGF)                                  | Cellular communication network factor 2 (Connective tissue growth factor) |                                           | Ss03392397_m1                                                        |
| COL1A1                                       | Collagen type I alpha 1 chain                                             |                                           | Ss03373340_m1                                                        |
| COL3A1                                       | Collagen type III alpha 1 chain                                           |                                           | Ss04323772_g1                                                        |
| FN1                                          | Fibronectin 1                                                             |                                           | Ss03373673_m1                                                        |
| IVL                                          | Involucrin                                                                |                                           | Ss03822369_s1                                                        |
| KRT1                                         | Keratin 1                                                                 |                                           | Ss03372954_m1                                                        |
| KRT6A                                        | Keratin 6a                                                                |                                           | Ss06938590_s1                                                        |
| TGFB1                                        | Transforming growth factor beta 1                                         |                                           | Ss04955543_m1                                                        |
| TGFB3                                        | Transforming growth factor beta 1                                         |                                           | Ss03394351_m1                                                        |
| TNC                                          | Tenascin C                                                                |                                           | Ss03394416_m1                                                        |
| HPRT1                                        | Hypoxanthine<br><br>phosphoribosyltransferase 1                           |                                           | Ss03388274                                                           |
| Made to order TaqMan® Gene Expression Assays |                                                                           |                                           |                                                                      |
| Gene symbol                                  | Gene name                                                                 | Primer/probe                              | Sequence 5'→3'                                                       |
| AXIN2                                        | Axin2                                                                     | Forward primer<br>Reverse primer<br>Probe | GAGGGAGAAATGCGTGGATA<br>GGTTTCAGCTGCTTGGAGAC<br>ACTTCTGGTTTGCCTGCAAT |
| KRT10                                        | Keratin 10                                                                | Forward primer                            | CCCAACTAGCCCTGAAACAA<br>GTATTCGGCATTCTGGCACT                         |

|                      |                                  |                                                 |                                                                      |
|----------------------|----------------------------------|-------------------------------------------------|----------------------------------------------------------------------|
|                      |                                  | Reverse<br>primer<br>Probe                      | CTACTGTGTGCAGCTCGCTC                                                 |
| <b><i>KRT17</i></b>  | Keratin 17                       | Forward<br>primer<br>Reverse<br>primer<br>Probe | GAACCACGAGGAGGAGATGA<br>CTCCGTCTTGCTGAAGAACC<br>GTACGAGAAGATGGCCGAGA |
| <b><i>WNT10A</i></b> | Wingless<br>family member<br>10A | Forward<br>primer<br>Reverse<br>primer<br>Probe | ACGAGTGCCAACACCAGTTC<br>AGGCACTCTCTCGGAAACCT<br>GCGCTGGAAGTCTCTAGTC  |
| <b><i>WNT11</i></b>  | Wingless<br>family member<br>11  | Forward<br>primer<br>Reverse<br>primer<br>Probe | GAGCTCATGCACACTGTCGT<br>TCTCTCCAGGTCAAGCAGGT<br>ACTGCTCCTCCATCGAGCT  |

**Supplementary Table S2:** Presentation of statistical analysis depicting the effect of different media (Ctrl medium, CM-Nor, or CM-Hyp) on the migration of pKERs over the time course (statistics refer to Figure 2A in the main body of manuscript).

| Hours [h] | Group       | lsmean | lower.CL | upper.CL | SE   | df   | 8     | 24           | 48           |
|-----------|-------------|--------|----------|----------|------|------|-------|--------------|--------------|
| 0         | Ctrl medium | 100,0  | 83,1     | 116,9    | 7,96 | 15,4 | 0,94  | 0,935        | <b>0,021</b> |
| 8         | Ctrl medium | 95,2   | 78,3     | 112,1    | 7,96 | 15,4 |       | 0,656        | <b>0,004</b> |
| 24        | Ctrl medium | 105,0  | 88,0     | 121,9    | 7,96 | 15,4 |       |              | 0,084        |
| 48        | Ctrl medium | 125,5  | 108,6    | 142,5    | 7,96 | 15,4 |       |              |              |
| 0         | CM-Nor      | 100,0  | 83,1     | 116,9    | 7,96 | 15,4 | 0,954 | 0,927        | 0,991        |
| 8         | CM-Nor      | 95,6   | 78,7     | 112,6    | 7,96 | 15,4 |       | 1,000        | 0,996        |
| 24        | CM-Nor      | 94,8   | 77,9     | 111,7    | 7,96 | 15,4 |       |              | 0,988        |
| 48        | CM-Nor      | 97,5   | 80,6     | 114,5    | 7,96 | 15,4 |       |              |              |
| 0         | CM-Hyp      | 100,0  | 83,1     | 116,9    | 7,96 | 15,4 | 0,228 | <b>0,043</b> | 0,133        |
| 8         | CM-Hyp      | 83,7   | 66,7     | 100,6    | 7,96 | 15,4 |       | 0,856        | 0,992        |
| 24        | CM-Hyp      | 77,0   | 60,0     | 93,9     | 7,96 | 15,4 |       |              | 0,956        |
| 48        | CM-Hyp      | 81,3   | 64,3     | 98,2     | 7,96 | 15,4 |       |              |              |

**Supplementary Table S3:** Presentation of statistical analysis depicting the effect of CM-Nor and CM-Nor +IL-1 $\beta$  on pKERs migration over the time course (statistics refer to Figure 2B in the main body of manuscript).

|                                                      | <b>Estimate</b>            | <b>Std. Error</b>    | <b>t value</b>                | <b>Pr(&gt; t )</b> |
|------------------------------------------------------|----------------------------|----------------------|-------------------------------|--------------------|
| <b>(Intercept)</b>                                   | 100,000                    | 5,47                 | 18,279                        | <b>&lt;0,001</b>   |
| <b>Group CM-Nor+IL-1<math>\beta</math></b>           | 0,000                      | 7,74                 | 0,000                         | 1,000              |
| <b>Hours 8</b>                                       | -4,374                     | 7,74                 | -0,565                        | 0,576              |
| <b>Hours 24</b>                                      | -5,185                     | 7,74                 | -0,670                        | 0,508              |
| <b>Hours 8</b>                                       | -2,466                     | 7,74                 | -0,319                        | 0,752              |
| <b>Group CM-Nor+IL-1<math>\beta</math>: Hours 8</b>  | 0,032                      | 10,94                | 0,003                         | 0,998              |
| <b>Group CM-Nor+IL-1<math>\beta</math>: Hours 24</b> | -0,549                     | 10,94                | -0,050                        | 0,960              |
| <b>Group CM-Nor+IL-1<math>\beta</math>: Hours 48</b> | 17,557                     | 10,94                | 1,605                         | 0,118              |
| <b>Observations</b>                                  | <b>Residual Std. Error</b> | <b>R<sup>2</sup></b> | <b>Adjusted R<sup>2</sup></b> |                    |
| 40                                                   | 12,2                       | 0,254                | 0,09                          |                    |

**Supplementary Table S4:** Presentation of statistical analysis depicting the effect of CM-Hyp and CM-Hyp +IL-1 $\beta$  on pKERs migration over the time course (statistics refer to Figure 2C in the main body of manuscript).

| Hours [h] | Group                 | lsmean | lower.CL | upper.CL | SE   | df   | 8     | 24    | 48    |
|-----------|-----------------------|--------|----------|----------|------|------|-------|-------|-------|
| 0         | CM-Hyp                | 100,0  | 82,1     | 117,9    | 8,54 | 19,4 | 0,384 | 0,126 | 0,268 |
| 8         | CM-Hyp                | 83,7   | 65,8     | 101,5    | 8,54 | 19,4 |       | 0,909 | 0,995 |
| 24        | CM-Hyp                | 77,0   | 59,1     | 94,8     | 8,54 | 19,4 |       |       | 0,973 |
| 48        | CM-Hyp                | 81,3   | 63,4     | 99,1     | 8,54 | 19,4 |       |       |       |
| 0         | CM-Hyp +IL-1 $\beta$  | 100,0  | 82,1     | 117,9    | 8,54 | 19,4 | 0,211 | 0,377 | 0,998 |
| 8         | CM-Hyp + IL-1 $\beta$ | 79,8   | 62,0     | 97,7     | 8,54 | 19,4 |       | 0,982 | 0,151 |
| 24        | CM-Hyp + IL-1 $\beta$ | 83,5   | 65,7     | 101,4    | 8,54 | 19,4 |       |       | 0,286 |
| 48        | CM-Hyp + IL-1 $\beta$ | 101,9  | 84,0     | 119,7    | 8,54 | 19,4 |       |       |       |

**Supplementary Table S5:** Presentation of statistical analysis depicting the effect of different media (Ctrl medium, CM-Nor, or CM-Hyp) on pDFs migration over the time course (statistics refer to Figure 3A in the main body of manuscript).

| Hours [h] | Group       | lsmean | lower.CL | upper.CL | SE   | df   | 24     | 48     | 72     |
|-----------|-------------|--------|----------|----------|------|------|--------|--------|--------|
| 0         | Ctrl medium | 100,00 | 93,08    | 106,92   | 3,35 | 23,9 | <0,001 | <0,001 | <0,001 |
| 24        | Ctrl medium | 9,47   | 2,55     | 16,39    | 3,35 | 23,9 |        | 0,271  | 0,093  |
| 48        | Ctrl medium | 2,20   | -4,72    | 9,12     | 3,35 | 23,9 |        |        | 0,944  |
| 72        | Ctrl medium | 0,00   | -6,92    | 6,92     | 3,35 | 23,9 |        |        |        |
| 0         | CM-Nor      | 100,00 | 93,08    | 106,92   | 3,35 | 23,9 | <0,001 | <0,001 | <0,001 |
| 24        | CM-Nor      | 25,31  | 18,39    | 32,23    | 3,35 | 23,9 |        | <0,001 | <0,001 |
| 48        | CM-Nor      | 4,58   | -2,34    | 11,50    | 3,35 | 23,9 |        |        | 0,656  |
| 72        | CM-Nor      | 0,00   | -6,92    | 6,92     | 3,35 | 23,9 |        |        |        |
| 0         | CM-Hyp      | 100,00 | 93,08    | 106,92   | 3,35 | 23,9 | <0,001 | <0,001 | <0,001 |
| 24        | CM-Hyp      | 34,23  | 27,31    | 41,15    | 3,35 | 23,9 |        | <0,001 | <0,001 |
| 48        | CM-Hyp      | 15,41  | 8,49     | 22,33    | 3,35 | 23,9 |        |        | 0,002  |
| 72        | CM-Hyp      | 0,00   | -6,92    | 6,92     | 3,35 | 23,9 |        |        |        |

**Supplementary Table S6:** Presentation of statistical analysis depicting the effect of CM-Nor and CM-Nor +bFGF on pDFs migration over the time course (statistics refer to Figure 3B in the main body of manuscript).

| Hours [h] | Group       | lsmean | lower.CL | upper.CL | SE   | df | 24     | 48     | 72     |
|-----------|-------------|--------|----------|----------|------|----|--------|--------|--------|
| 0         | CM-Nor      | 100,00 | 92,96    | 107,04   | 3,46 | 32 | <0,001 | <0,001 | <0,001 |
| 24        | CM-Nor      | 25,31  | 18,27    | 32,35    | 3,46 | 32 |        | <0,001 | <0,001 |
| 48        | CM-Nor      | 4,58   | -2,46    | 11,62    | 3,46 | 32 |        |        | 0,785  |
| 72        | CM-Nor      | 0,00   | -7,04    | 7,04     | 3,46 | 32 |        |        |        |
| 0         | CM-Nor+bFGF | 100,00 | 92,96    | 107,04   | 3,46 | 32 | <0,001 | <0,001 | <0,001 |
| 24        | CM-Nor+bFGF | 18,89  | 11,85    | 25,94    | 3,46 | 32 |        | 0,003  | 0,003  |
| 48        | CM-Nor+bFGF | 0,00   | -7,04    | 7,04     | 3,46 | 32 |        |        | 1,000  |
| 72        | CM-Nor+bFGF | 0,00   | -7,04    | 7,04     | 3,46 | 32 |        |        |        |



**Supplementary Table S7:** Presentation of statistical analysis depicting the effect of CM-Hyp and CM-Hyp +bFGF on pDFs migration over the time course (statistics refer to Figure 3C in the main body of manuscript).

| Hours [h] | Group       | lsmean | lower.CL | upper.CL | SE   | df | 24     | 48     | 72     |
|-----------|-------------|--------|----------|----------|------|----|--------|--------|--------|
| 0         | CM-Hyp      | 100,0  | 93,70    | 106,30   | 3,09 | 32 | <0,001 | <0,001 | <0,001 |
| 24        | CM-Hyp      | 34,2   | 27,93    | 40,52    | 3,09 | 32 |        | 0,001  | <0,001 |
| 48        | CM-Hyp      | 15,4   | 9,11     | 21,70    | 3,09 | 32 |        |        | 0,008  |
| 72        | CM-Hyp      | 0,0    | -6,29    | 6,29     | 3,09 | 32 |        |        |        |
| 0         | CM-Hyp+bFGF | 100,0  | 93,70    | 106,30   | 3,09 | 32 | <0,001 | <0,001 | <0,001 |
| 24        | CM-Hyp+bFGF | 17,7   | 11,43    | 24,02    | 3,09 | 32 |        | 0,002  | 0,002  |
| 48        | CM-Hyp+bFGF | 0,0    | -6,29    | 6,29     | 3,09 | 32 |        |        | 1,000  |
| 72        | CM-Hyp+bFGF | 0,0    | -6,29    | 6,29     | 3,09 | 32 |        |        |        |

**Supplementary Table S8:** Presentation of statistical analysis depicting the effect of different media (Ctrl medium, CM-Nor, or CM-Hyp) on pDFs contractility over the time course (statistics refer to Figure 4A in the main body of manuscript).

| Day | Group       | lsmean | lower.CL | upper.CL | SE   | df   | 1      | 2      | 3      | 4      | 5      | 6      | 7      | 8      | 9      |
|-----|-------------|--------|----------|----------|------|------|--------|--------|--------|--------|--------|--------|--------|--------|--------|
| 0   | Ctrl medium | 100,0  | 93,3     | 106,7    | 3,23 | 21,2 | <0,001 | <0,001 | <0,001 | <0,001 | <0,001 | <0,001 | <0,001 | <0,001 | <0,001 |
| 1   | Ctrl medium | 84,1   | 77,4     | 90,8     | 3,23 | 21,2 |        | 0,289  | 0,106  | 0,2    | 0,036  | <0,001 | <0,001 | <0,001 | <0,001 |
| 2   | Ctrl medium | 75,3   | 68,5     | 82,0     | 3,23 | 21,2 |        |        | 1,000  | 1,000  | 0,997  | 0,453  | 0,252  | 0,325  | 0,205  |
| 3   | Ctrl medium | 73,6   | 66,9     | 80,4     | 3,23 | 21,2 |        |        |        | 1,000  | 1,000  | 0,746  | 0,517  | 0,612  | 0,448  |
| 4   | Ctrl medium | 74,6   | 67,9     | 81,3     | 3,23 | 21,2 |        |        |        |        | 1,000  | 0,573  | 0,347  | 0,433  | 0,289  |
| 5   | Ctrl medium | 72,2   | 65,5     | 78,9     | 3,23 | 21,2 |        |        |        |        |        | 0,924  | 0,768  | 0,842  | 0,705  |
| 6   | Ctrl medium | 66,9   | 59,8     | 74,0     | 3,48 | 27,2 |        |        |        |        |        |        | 1,000  | 1,000  | 1,000  |

|   |             |       |      |       |      |      |        |        |        |        |        |        |        |        |        |
|---|-------------|-------|------|-------|------|------|--------|--------|--------|--------|--------|--------|--------|--------|--------|
| 7 | Ctrl medium | 65,6  | 58,5 | 72,7  | 3,48 | 27,2 |        |        |        |        |        |        |        | 1,000  | 1,000  |
| 8 | Ctrl medium | 66,1  | 59,0 | 73,3  | 3,48 | 27,2 |        |        |        |        |        |        |        |        | 1,000  |
| 9 | Ctrl medium | 65,2  | 58,1 | 72,4  | 3,48 | 27,2 |        |        |        |        |        |        |        |        |        |
| 0 | CM-Nor      | 100,0 | 93,3 | 106,7 | 3,23 | 21,2 | <0,001 | <0,001 | <0,001 | <0,001 | <0,001 | <0,001 | <0,001 | <0,001 | <0,001 |
| 1 | CM-Nor      | 75,8  | 69,1 | 82,5  | 3,23 | 21,2 |        | 0,625  | 0,211  | 0,104  | 0,004  | 0,001  | <0,001 | <0,001 | <0,001 |
| 2 | CM-Nor      | 68,8  | 62,1 | 75,5  | 3,23 | 21,2 |        |        | 1,000  | 0,992  | 0,531  | 0,254  | 0,142  | 0,002  | <0,001 |
| 3 | CM-Nor      | 66,4  | 59,6 | 73,1  | 3,23 | 21,2 |        |        |        | 1,000  | 0,918  | 0,66   | 0,473  | 0,02   | 0,003  |
| 4 | CM-Nor      | 65,3  | 58,5 | 72,0  | 3,23 | 21,2 |        |        |        |        | 0,982  | 0,834  | 0,672  | 0,046  | 0,009  |
| 5 | CM-Nor      | 61,3  | 54,6 | 68,0  | 3,23 | 21,2 |        |        |        |        |        | 1,000  | 0,998  | 0,452  | 0,163  |
| 6 | CM-Nor      | 59,1  | 52,0 | 66,3  | 3,48 | 27,2 |        |        |        |        |        |        | 1,000  | 0,863  | 0,544  |
| 7 | CM-Nor      | 58,1  | 51,0 | 65,3  | 3,48 | 27,2 |        |        |        |        |        |        |        | 0,951  | 0,72   |
| 8 | CM-Nor      | 52,9  | 45,8 | 60,1  | 3,48 | 27,2 |        |        |        |        |        |        |        |        | 1,000  |
| 9 | CM-Nor      | 50,9  | 43,7 | 58,0  | 3,48 | 27,2 |        |        |        |        |        |        |        |        |        |
| 0 | CM-Hyp      | 100,0 | 93,3 | 106,7 | 3,23 | 21,2 | <0,001 | <0,001 | <0,001 | <0,001 | <0,001 | <0,001 | <0,001 | <0,001 | <0,001 |
| 1 | CM-Hyp      | 72,7  | 65,9 | 79,4  | 3,23 | 21,2 |        | 0,504  | 0,078  | 0,028  | 0,04   | 0,012  | 0,007  | <0,001 | <0,001 |
| 2 | CM-Hyp      | 65,1  | 58,3 | 71,8  | 3,23 | 21,2 |        |        | 0,995  | 0,952  | 0,975  | 0,793  | 0,71   | 0,236  | 0,003  |
| 3 | CM-Hyp      | 61,8  | 55,0 | 68,5  | 3,23 | 21,2 |        |        |        | 1,000  | 1,000  | 0,998  | 0,994  | 0,783  | 0,052  |
| 4 | CM-Hyp      | 60,4  | 53,7 | 67,2  | 3,23 | 21,2 |        |        |        |        | 1,000  | 1,000  | 1,000  | 0,934  | 0,127  |
| 5 | CM-Hyp      | 60,9  | 54,2 | 67,6  | 3,23 | 21,2 |        |        |        |        |        | 1,000  | 0,999  | 0,895  | 0,096  |
| 6 | CM-Hyp      | 58,6  | 51,5 | 65,8  | 3,48 | 27,2 |        |        |        |        |        |        | 1,000  | 0,998  | 0,413  |
| 7 | CM-Hyp      | 58,1  | 51,0 | 65,2  | 3,48 | 27,2 |        |        |        |        |        |        |        | 0,999  | 0,5    |
| 8 | CM-Hyp      | 55,3  | 48,1 | 62,4  | 3,48 | 27,2 |        |        |        |        |        |        |        |        | 0,915  |
| 9 | CM-Hyp      | 49,6  | 42,4 | 56,7  | 3,48 | 27,2 |        |        |        |        |        |        |        |        |        |

Supplementary Figure S1

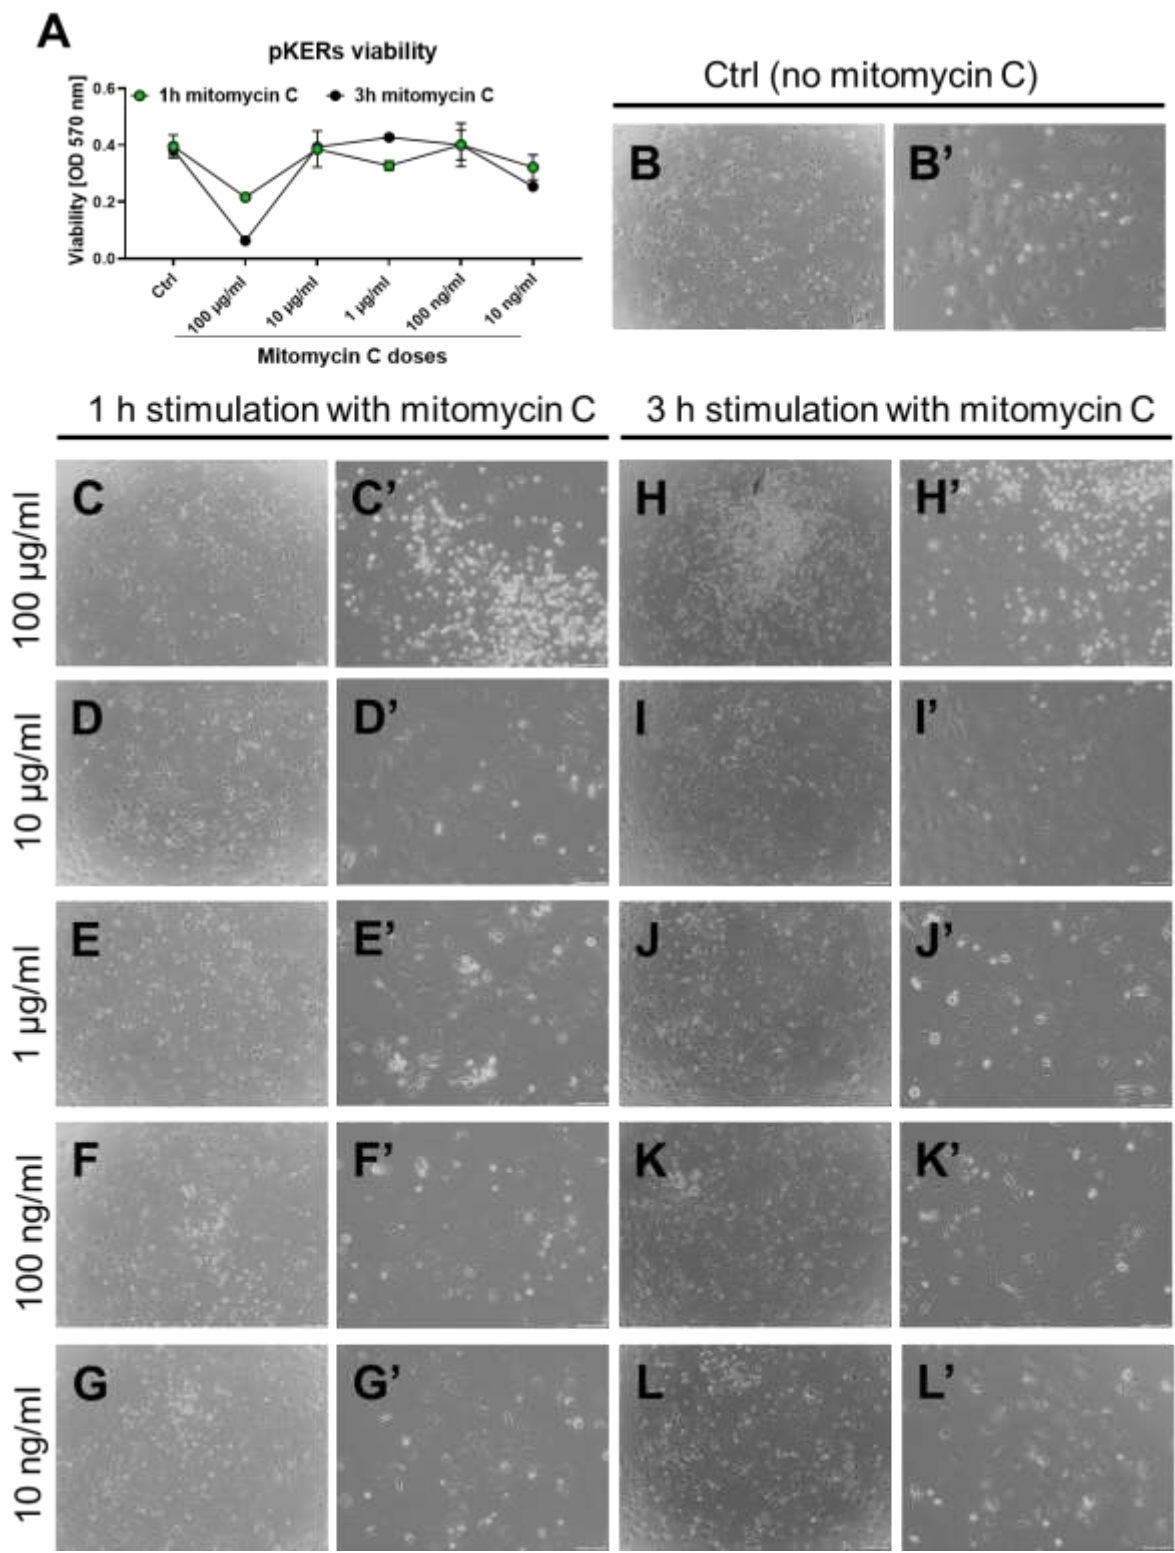

### Supplementary Figure S1.

#### Dose and time response of pKERs ( $p = 1$ ) to mitomycin C stimulation.

Cells were seeded onto 24-well plates at a density of  $0.5 \times 10^6$  per well and allow to growth in keratinocyte culture medium (EpiLife™; Gibco, Life Technologies Corporation, Grand Island, NY, USA). After 48 h, the cells were treated with mitomycin C (Sigma-Aldrich Co., St. Louis, MO, USA) at the concentrations of 100  $\mu\text{g/mL}$ , 10  $\mu\text{g/mL}$ , 1  $\mu\text{g/mL}$ , 100  $\text{ng/mL}$ , or 10  $\text{ng/mL}$  in keratinocyte culture medium for 3 h or 1 h, cultures with no mitomycin C were used as control. Next, the treatment was removed, cells were washed with PBS and fresh keratinocyte culture medium was added. After 24 h toxicity of mitomycin C was examined via cell viability assay based on MTT (3-[4,5-dimethylthiazol-2-yl]- 2,5-diphenyltetrazolium bromide; Sigma-Aldrich Co., St. Louis, MO, USA) colorimetric method [1].

There were no differences in cell viability between control cells (Ctrl; A, B, B') and pKERs pre-treated with mitomycin C at doses 10  $\mu\text{g/mL}$ , 1  $\mu\text{g/mL}$ , 100  $\text{ng/mL}$ , or 10  $\text{ng/mL}$ , regardless of the exposure time (1 h or 3 h; A, D – L'). However, higher dose of mitomycin C (100  $\mu\text{g/mL}$ ) showed toxic effect on pKERs manifested by the decrease in their viability and their massive detachment from the growth surface (A, C, C', H, H'). Mitomycin C at dose of 10  $\mu\text{g/mL}$  that was used in our and other studies [1-5] had no effect on pKERs viability as compared to control-treated cells (A, B, B', D, D', I, I') and relative to lower doses of the treatment (A, E-L'). These results indicate that the concentration of 10  $\mu\text{g/mL}$  mitomycin C is the highest effective dose that subsequently has no toxic effect on the cell viability. Moreover, no differences between both tested time points (1 h or 3 h) were observed for mitomycin C at doses 10  $\mu\text{g/mL}$ , 1  $\mu\text{g/mL}$ , 100  $\text{ng/mL}$ , or 10  $\text{ng/mL}$  (A, B, B', D-L'). However, exposure to dose 100  $\mu\text{g/mL}$  for 3 h led to greater decrease in cell viability as compared to the effect observed after 1 h of administration with the treatment (A, C-H'). Therefore, to minimize the negative effect of mitomycin C pKERs were pre-treated for 1 h. Together, these comparative data indicate that pre-treatment with mitomycin C at the concentration of 10  $\mu\text{g/mL}$  for 1 h has no toxic effect on pKERs and the condition does not contribute to the cell detachment from the growth surface in wound migration assay.

Figure S1 abbreviations: pKERs; pig keratinocytes. Scale bars: 200  $\mu\text{m}$  (B-L); 100  $\mu\text{m}$  (B'-L').

#### References:

- [1] Gawronska-Kozak B, Kirk-Ballard H. Cyclosporin A reduces matrix metalloproteinases and collagen expression in dermal fibroblasts from regenerative FOXN1 deficient (nude) mice. *Fibrogenesis Tissue Repair*. 2013 Apr 2;6(1):7. doi: 10.1186/1755-1536-6-7. PMID: 23547542; PMCID: PMC3637475.
- [2] Bukowska J, Kopcewicz M, Kur-Piotrowska A, Szostek-Mioduchowska AZ, Walendzik K, Gawronska-Kozak B. Effect of TGF $\beta$ 1, TGF $\beta$ 3 and keratinocyte conditioned media on functional characteristics of dermal fibroblasts derived from

reparative (Balb/c) and regenerative (Foxn1 deficient; nude) mouse models. *Cell Tissue Res.* 2018 Oct;374(1):149-163. doi: 10.1007/s00441-018-2836-8. Epub 2018 Apr 10. PMID: 29637306; PMCID: PMC6132647.

[3] Bukowska, J., Słowińska, M., Cierniak, P. *et al.* The effect of hypoxia on the proteomic signature of pig adipose-derived stromal/stem cells (pASCs). *Sci Rep* **10**, 20035 (2020). <https://doi.org/10.1038/s41598-020-76796-7>.

[4] Kur-Piotrowska, A., Bukowska, J., Kopcewicz, M.M. *et al.* Foxn1 expression in keratinocytes is stimulated by hypoxia: further evidence of its role in skin wound healing. *Sci Rep* **8**, 5425 (2018). <https://doi.org/10.1038/s41598-018-23794-5>.

[5] Kyriakides TR, Wulsin D, Skokos EA, Fleckman P, Pirrone A, Shipley JM, Senior RM, Bornstein P. Mice that lack matrix metalloproteinase-9 display delayed wound healing associated with delayed reepithelization and disordered collagen fibrillogenesis. *Matrix Biol.* 2009 Mar;28(2):65-73. doi: 10.1016/j.matbio.2009.01.001. Epub 2009 Jan 20. PMID: 19379668; PMCID: PMC2673333.
